# Supplementary material
Source: MDPI journal article supplement (https://www.mdpi.com/2410-3888/7/6/373)
Supplement: s1 [file s1]

**Table S1.** Sampling information (per replicate, R) and morphometric measurements (mean total length  $\pm$  standard deviation of zebrafish juveniles, males and females studied for swimming capacity. TL = total length; T<sub>E</sub> = embryonic temperature; n = number of samples.

| Juveniles           |    |                |    |                | Females |                |    |                | Males |                |    |                |
|---------------------|----|----------------|----|----------------|---------|----------------|----|----------------|-------|----------------|----|----------------|
| R1                  |    | R2             |    |                | R1      |                | R2 |                | R1    |                | R2 |                |
| T <sub>E</sub> (°C) | n  | TL             | n  | TL             | n       | TL (mm)        | n  | TL (mm)        | n     | TL (mm)        | n  | TL (mm)        |
| 24                  | 13 | 12.6 $\pm$ 0.9 | 13 | 13.1 $\pm$ 0.6 | 10      | 28.5 $\pm$ 1.3 | 5  | 28.2 $\pm$ 1.1 | 7     | 27.8 $\pm$ 0.9 | 16 | 27.4 $\pm$ 1.1 |
| 28                  | 15 | 12.4 $\pm$ 0.7 | 14 | 13.4 $\pm$ 0.7 | 12      | 28.3 $\pm$ 0.9 | 8  | 27.0 $\pm$ 1.3 | 14    | 28.2 $\pm$ 1.5 | 13 | 26.8 $\pm$ 1.3 |
| 32                  | 11 | 12.4 $\pm$ 0.8 | 10 | 13.5 $\pm$ 1.0 | 11      | 28.7 $\pm$ 1.4 | 6  | 27.4 $\pm$ 1.8 | 8     | 29.1 $\pm$ 1.5 | 13 | 27.2 $\pm$ 1.3 |

**Table S2.** Sampling information (per replicate, R) and morphometric measurements (mean total length  $\pm$  standard deviation) of zebrafish juveniles, males and females studied for heart morphometry. TL = total length; T<sub>E</sub> = embryonic temperature; n = number of samples.

| Juveniles           |    |                |   |                | Females |                |    |                | Males |                |    |                |
|---------------------|----|----------------|---|----------------|---------|----------------|----|----------------|-------|----------------|----|----------------|
| R1                  |    | R2             |   |                | R1      |                | R2 |                | R1    |                | R2 |                |
| T <sub>E</sub> (°C) | n  | TL             | n | TL             | n       | TL (mm)        | n  | TL (mm)        | n     | TL (mm)        | n  | TL (mm)        |
| 24                  | 9  | 12.7 $\pm$ 0.9 | 5 | 12.9 $\pm$ 0.3 | 4       | 28.7 $\pm$ 1.8 | 3  | 28.4 $\pm$ 1.3 | 4     | 27.4 $\pm$ 1.1 | 2  | 28.0 $\pm$ 0.8 |
| 28                  | 11 | 12.4 $\pm$ 0.8 | 5 | 12.9 $\pm$ 0.9 | 3       | 27.9 $\pm$ 1.2 | 2  | 27.0 $\pm$ 1.3 | 3     | 27.8 $\pm$ 1.7 | 3  | 27.0 $\pm$ 1.2 |
| 32                  | 10 | 12.7 $\pm$ 0.9 | 5 | 13.1 $\pm$ 1.2 | 3       | 28.7 $\pm$ 1.5 | 3  | 26.7 $\pm$ 2.2 | 3     | 29.8 $\pm$ 1.5 | 3  | 26.0 $\pm$ 0.5 |
